# Supplementary material for: Development of the Ultra-Low Vision Visual Functioning Questionnaire (ULV-VFQ)
Source: PubMed Central journal article supplement — Transl Vis Sci Technol. 2017 May 31;6(3):11. doi: 10.1167/tvst.6.3.11 (PMC5450923; doi:10.1167/tvst.6.3.11), 2017-05-31
Supplement: tvst-06-02-06_s01.pdf [file tvst-06-02-06_s01.pdf]

## Supplementary Material S1. Items for Round 1 and Revised Round 2 Questionnaire Development

**INSTRUCTIONS TO PARTICIPANTS:** Below is a list of 149/150 survey questions about activities you may do on a day-to-day basis or have done in the past. Although you may complete many of these activities using auditory, tactile or a combination of sensory information including the use of a cane, a guide dog or help from another person, we would like you to focus on how difficult it is for you to complete the activities on your own using only your remaining vision. It is OK if the task is achieved using visual assistive devices, such as a magnifier or CCTV. There is a large degree in variability in the amount of remaining vision among the participants of this survey and activities in which they participate. Not every question may be applicable to your experience. Please answer as many questions as possible to the best of your ability. Your answer choices are: “not applicable”, “not difficult”, “somewhat difficult”, “very difficult”, and “Impossible to see or do visually”. We have added a comment block with each question, allowing you to add notes that will help us understand why a question may have been puzzling, not applicable, or difficult for you to answer. You do not have to add comments, but feel free to do so. Finally, if you currently have no useful vision at all, we ask you to think back of the last time period when you still did have some useable vision. For this reason, we have added a few questions at the beginning about the history of your vision loss. Please note: Every question requires exactly one response in addition to any optional comments you might add. If you miss a question or have accidentally clicked on multiple responses, you will not be able to proceed to the next page of questions until the item is resolved. An error message will appear at the top of the question at issue. There are 5 questions per page for a total of 30 pages. You may not skip a question however, you can take a break and come back to the questionnaire at any time. In order to save your responses and exit the survey, you must press "Next" or "Done" first (located at the bottom of each page), then "Exit Survey" (located in the upper right corner).

**Visual Aspects Coding:** Contrast (CO), Lighting (LM), Environmental Lighting (EL), Familiarity (FM), Motion Perception (MP), Distance (DI), Size (SZ), and Miscellaneous (MI).

**Functional Domain Coding:** Reading (RE), Mobility (MO), Visual Motor (VM), Information Gathering (IG).

| Item # | Original Items (Round 1)                                                                        | Visual Aspect | Functional Domain | Revision status | Visual Aspect | Functional Domain | Revised Items (Round 2)                                                                                              |
|--------|-------------------------------------------------------------------------------------------------|---------------|-------------------|-----------------|---------------|-------------------|----------------------------------------------------------------------------------------------------------------------|
| 1      | When receiving a printed page, how difficult is it to see which side has print?                 | CO            | IG                | Minor Revision  | CO            | IG                | When receiving a printed page, how difficult is it to see which side is blank versus which side has print?           |
| 2      | How difficult is it for you to find a sunny, open spot in the garden to plant a tree or flower? | EL            | IG                | Minor Revision  | EL            | IG                | How difficult is it for you to see a sunny spot in the garden to plant a tree or flower?                             |
| 3      | How difficult is it for you to recognize a person based on their size or build?                 | FM            | IG                | Minor Revision  | FM            | IG                | How difficult is it for you to recognize a family member or friend based on their size or build standing 5 ft. away? |
| 4      | How difficult would it be to see a black cat or dog on a white carpet?                          | CO            | IG                | Major Revision  | CO            | IG                | How difficult would it be to see a large, black cat or dog lying on a white carpet in a brightly lit room?           |

| <b>Item #</b> | <b>Original Items (Round 1)</b>                                                                                      | <b>Visual Aspect</b> | <b>Functional Domain</b> | <b>Revision status</b> | <b>Visual Aspect</b> | <b>Functional Domain</b> | <b>Revised Items (Round 2)</b>                                                                                                             |
|---------------|----------------------------------------------------------------------------------------------------------------------|----------------------|--------------------------|------------------------|----------------------|--------------------------|--------------------------------------------------------------------------------------------------------------------------------------------|
| 5             | How difficult is it for you to see a green garden hose in the grass on a sunny day?                                  | CO                   | IG                       | <i>Minor Revision</i>  | CO                   | IG                       | How difficult is it for you to see a green garden hose coiled on the light-gray pavement on a sunny day?                                   |
| 6             | When you approach an intersection on a sunny day, how difficult is to see if there is a stop sign?                   | CO                   | IG                       | <i>Minor Revision</i>  | CO                   | IG                       | When you approach an intersection on an overcast day, how difficult is to see if there is a stop sign?                                     |
| 7             | When standing on a suburban sidewalk, how difficult is it for you to see the edge where the lawn meets the pavement? | CO                   | IG                       | <i>Major Revision</i>  | CO                   | IG                       | When standing outside on a cloudy day, how difficult is it for you to see the edge where a dark, green lawn meets the black pavement?      |
| 8             | When watching a sporting event on TV, how difficult is it to see in which direction the players are moving?          | MP                   | IG                       | <i>Major Revision</i>  | MP                   | IG                       | When watching a ice hockey game on a large TV, how difficult is it to see in which direction the players wearing dark uniforms are moving? |
| 9             | When cleaning white counter surfaces, how difficult is it for you to see a blob of grape jelly?                      | CO                   | IG                       | <i>Minor Revision</i>  | CO                   | IG                       | When cleaning the white counter surfaces in a well-lit kitchen, how difficult is it for you to see a large blob of grape jelly?            |
| 10            | When signing a form, how difficult is it to see the line you need to sign on?                                        | CO                   | IG                       | <i>Minor Revision</i>  | CO                   | IG                       | When signing a form, how difficult is it to visually locate the line you need to sign on?                                                  |
| 11            | How difficult is it to see a bright icon on a smartphone screen?                                                     | CO                   | IG                       | <i>Minor Revision</i>  | CO                   | IG                       | How difficult is it to see a bright icon on an iPad or tablet in a dark room?                                                              |
| 12            | When entering a place of worship, how difficult is to adjust from a bright sunny day to the dim interior lighting?   | MI                   | MO                       | <i>Major Revision</i>  | MI                   | MO                       | When entering a building, how difficult is to adjust from a bright sunny day to the dim interior lighting after 5 minutes?                 |
| 13            | When playing checkers, how difficult is it to see a black game piece on the black square?                            | CO                   | IG                       | <i>Major Revision</i>  | CO                   | IG                       | When playing chess, how difficult is it to see a black game piece on a white square?                                                       |
| 14            | When sitting down for dinner, how difficult is it to visually locate the silverware on a white table?                | CO                   | IG                       | <i>Minor Revision</i>  | CO                   | IG                       | When sitting down for dinner, how difficult is it to visually locate the silverware on a white table in a dimly lit room?                  |

| Item # | Original Items (Round 1)                                                                                                                      | Visual Aspect | Functional Domain | Revision status | Visual Aspect | Functional Domain | Revised Items (Round 2)                                                                                                                 |
|--------|-----------------------------------------------------------------------------------------------------------------------------------------------|---------------|-------------------|-----------------|---------------|-------------------|-----------------------------------------------------------------------------------------------------------------------------------------|
| 15     | When shopping, how difficult is it to find your way down an aisle with white-flooring and dark shelves without bumping into them?             | CO            | IG                | Major Revision  | CO            | IG                | When shopping, how difficult is it to see an aisle with white-flooring and dark shelves?                                                |
| 16     | When supervising a child, how difficult is it to visually follow a child playing in the room?                                                 | MP            | VM                | Major Revision  | MP            | VM                | When supervising a toddler, how difficult is it to visually follow him/her as they move around the room?                                |
| 17     | When working out at the gym and selecting weight on a weight machine, how difficult is it for you to read the white numbers on a black plate? | CO            | IG                | Major Revision  | CO            | IG                | When selecting weight on a weight machine at the gym, how difficult is it for you to see the white numbers on a black plate?            |
| 18     | When watching the weather on TV, how difficult is it for you to see the weather man or woman walking in front of the map?                     | MP            | VM                | Deleted         |               |                   |                                                                                                                                         |
| 19     | When baking, how difficult is it to see if you've completely covered a chocolate cake with white icing?                                       | CO            | IG                | Minor Revision  | CO            | IG                | When baking in a well-lit kitchen, how difficult is it to see if you've completely covered a chocolate cake with white icing?           |
| 20     | How difficult is it to see a white tube of cream or lotion on a white bathroom counter?                                                       | CO            | IG                | No Change       | CO            | IG                | How difficult is it to see a white tube of cream or lotion on a white bathroom counter?                                                 |
| 21     | When at the aquarium, how difficult is it to see if there are fish swimming in a tank?                                                        | MP            | VM                | Minor Revision  | MP            | VM                | When at the aquarium, how difficult is it to see if there are large, dark fish swimming in a tank with a light background?              |
| 22     | How difficult is it for you to see your plate of food in a well-lit restaurant?                                                               | CO            | IG                | Minor Revision  | CO            | IG                | How difficult is it for you to see your white plate on a dark tablecloth in a well-lit restaurant?                                      |
| 23     | How difficult is it for you to see the difference between the clear shampoo and creamy conditioner when you squeeze it out of a bottle?       | CO            | IG                | Minor Revision  | CO            | IG                | How difficult is it for you to see the difference between the clear shampoo and creamy conditioner when you squeeze it out of a bottle? |
| 24     | After marking wood with a dark pen, how difficult is it to follow the line when cutting it?                                                   | CO            | VM                | Minor Revision  | CO            | VM                | After marking light pine wood with a thick, black marker, how difficult is it to follow the line when cutting it?                       |

| Item # | Original Items (Round 1)                                                                                                                                               | Visual Aspect | Functional Domain | Revision status | Visual Aspect | Functional Domain | Revised Items (Round 2)                                                                                                                                    |
|--------|------------------------------------------------------------------------------------------------------------------------------------------------------------------------|---------------|-------------------|-----------------|---------------|-------------------|------------------------------------------------------------------------------------------------------------------------------------------------------------|
| 25     | When setting the controls on a cardio machine, how difficult is it for you to identify the white buttons on the black panel?                                           | CO            | IG                | Minor Revision  | CO            | IG                | When setting the controls on a cardio machine, how difficult is it for you to see the white buttons on the black panel?                                    |
| 26     | When facing a sunlit window in a coffee shop, how difficult is it for you to see pedestrians standing on the sidewalk?                                                 | MP            | VM                | Major Revision  | MP            | VM                | When facing a window on an overcast day in a coffee shop, how difficult is it for you to see pedestrians walking on the sidewalk?                          |
| 27     | In an unfamiliar train station, how difficult is it for you to find the ticket counter on your own?                                                                    | FM            | IG                | Minor Revision  | FM            | IG                | In an unfamiliar train station, how difficult is it for you to see where the ticket counter is on your own?                                                |
| 28     | How difficult is it to see if the dark red curtain is drawn in a dimly lit theater?                                                                                    | LM            | IG                | Minor Revision  | LM            | IG                | How difficult is it to see if the dark red curtain is drawn in a brightly lit theater?                                                                     |
| 29     | When picking up a fish you've just caught, how difficult is it to see where its head is?                                                                               | MI            | VM                | Deleted         |               |                   |                                                                                                                                                            |
| 30     | How difficult is to see if a mirror is clean in bright lighting?                                                                                                       | LM            | IG                | Minor Revision  | LM            | IG                | How difficult is to see if a mirror is clean in optimal lighting conditions?                                                                               |
| 31     | When walking into a meeting room, how difficult is it to see if a seat is empty?                                                                                       | MI            | IG                | Minor Revision  | MI            | IG                | When walking into a well-lit meeting room, how difficult is it to see if a seat is empty?                                                                  |
| 32     | When watching a sporting event on TV, how difficult is it for you to distinguish between the team wearing the lighter uniform and the team wearing the darker uniform? | CO            | IG                | Minor Revision  | CO            | IG                | When watching football on TV, how difficult is it for you to distinguish teams wearing light and dark uniforms facing each other at the line of scrimmage? |
| 33     | How difficult is to see a basketball lying on light concrete surface?                                                                                                  | CO            | IG                | Major Revision  | CO            | IG                | How difficult is to see a black bowling ball on a well-lit, light hardwood surface from 5 ft. away?                                                        |
| 34     | When viewing a webpage with a white background, how difficult is it to see the outline of a picture?                                                                   | CO            | IG                | Major Revision  | CO            | IG                | When viewing a webpage with a dark background, how difficult is it to see the border of a text box ?                                                       |

| Item # | Original Items (Round 1)                                                                                              | Visual Aspect | Functional Domain | Revision status | Visual Aspect | Functional Domain | Revised Items (Round 2)                                                                                                                |
|--------|-----------------------------------------------------------------------------------------------------------------------|---------------|-------------------|-----------------|---------------|-------------------|----------------------------------------------------------------------------------------------------------------------------------------|
| 35     | When boating, how difficult is it to recognize a white boat tied to the pier in a harbor?                             | CO            | IG                | Major Revision  | CO            | IG                | When standing in a marina on a sunny day, how difficult is it to recognize a white boat 6 ft. away, tied to the dock?                  |
| 36     | How difficult is it for you to navigate a dimly lit dance floor at a crowded club using your remaining vision?        | EL            | MO                | Deleted         |               |                   |                                                                                                                                        |
| 37     | When walking onto a stage to perform or speak in public, how difficult is it to visually locate the podium?           | LM            | VM                | Minor Revision  | LM            | VM                | When walking onto a stage to perform or speak in public, how difficult is it to visually locate the well-lit podium?                   |
| 38     | When playing a game with dice, how difficult is to see the pair of white dice against a dark background?              | CO            | VM                | Minor Revision  | CO            | VM                | When playing a game with dice, how difficult is to locate the pair of white dice against a dark background?                            |
| 39     | How difficult is it to see a dark towel or washcloth hanging in the bathroom against a white wall?                    | CO            | IG                | Minor Revision  | CO            | IG                | How difficult is it to see a dark towel or washcloth hanging in the well-lit bathroom against a white wall?                            |
| 40     | How difficult is it for you to see a white-painted crosswalk on the pavement?                                         | CO            | MO                | Minor Revision  | CO            | MO                | How difficult is it for you to see a freshly-painted white crosswalk on dark pavement on a cloudy day?                                 |
| 41     | When playing solitaire on a computer, how difficult is it to see if there are white cards against a green background? | CO            | VM                | Minor Revision  | CO            | VM                | When playing solitaire on a computer, how difficult is it to locate the white cards against a green background?                        |
| 42     | When using a computer, how difficult is it to see white or yellow large print on a black screen?                      | CO            | IG                | Major Revision  | CO            | IG                | When using an assistive device such as a magnifier or CCTV, how difficult is it to see large, white or yellow print on a black screen? |
| 43     | How difficult is it for you to pour coffee or black tea into a white cup without spilling?                            | CO            | IG                | Minor Revision  | CO            | IG                | How difficult is it for you to see how much coffee or black tea is in a white cup?                                                     |
| 44     | When at the beach, how difficult is it for you to identify your dark towel on the light-colored sand?                 | CO            | IG                | Minor Revision  | CO            | IG                | When at the beach, how difficult is it for you to see a dark towel on the light-colored sand?                                          |

| Item # | Original Items (Round 1)                                                                                                                | Visual Aspect | Functional Domain | Revision status | Visual Aspect | Functional Domain | Revised Items (Round 2)                                                                                                                                 |
|--------|-----------------------------------------------------------------------------------------------------------------------------------------|---------------|-------------------|-----------------|---------------|-------------------|---------------------------------------------------------------------------------------------------------------------------------------------------------|
| 45     | When shopping in an unfamiliar store, how difficult is it to find the register without assistance?                                      | FM            | IG                | Minor Revision  | FM            | IG                | When shopping in an unfamiliar store, how difficult is it to locate the register using only your remaining vision?                                      |
| 46     | When attending your place of worship, how difficult is it to see a person wearing bright-colored clothing sitting on a dark pew?        | CO            | IG                | Major Revision  | CO            | IG                | When attending a place of worship, how difficult is it to see a person wearing a white shirt sitting in a dark pew?                                     |
| 47     | When on a plane, how difficult is it for you to find your seat by sight after using the lavatory?                                       | FM            | MO                | Major Revision  | LM            | IG                | When flying on a plane during the day, how difficult is it for you to determine if the window shade is open?                                            |
| 48     | When playing a piano, how difficult is it to see the difference between the black and white keys?                                       | CO            | VM                | Minor Revision  | CO            | VM                | When playing a piano in a well-lit room, how difficult is it to see the difference between the black and white keys?                                    |
| 49     | When swimming with goggles, how difficult is it for you to follow the black lines on the bottom of the pool?                            | CO            | VM                | Major Revision  | CO            | RE                | When at the pool, how difficult is it to see the black number at the edge indicating the depth?                                                         |
| 50     | When baking, how difficult is it to see dark brown sugar in a white measuring cup?                                                      | CO            | IG                | No Change       | CO            | IG                | When baking, how difficult is it to see dark brown sugar in a white measuring cup?                                                                      |
| 51     | When attending an evening social function, how difficult is it for you to adjust from the dark outdoors to the bright lighting indoors? | MI            | IG                | Minor Revision  | MI            | IG                | When attending an evening social function, how difficult is it for you to adjust from the dark outdoors to the bright lighting indoors after 2 minutes? |
| 52     | When walking or hiking, how difficult is it to see a tree branch hanging in your path one foot away?                                    | DI            | MO                | Minor Revision  | DI            | MO                | When walking or hiking on a cloudy day, how difficult is it to see a tree branch hanging in your path one foot away?                                    |
| 53     | How difficult is it for you to see a red wine stain on white clothing?                                                                  | CO            | IG                | Major Revision  | CO            | IG                | When sitting down at dinner, how difficult is it for you to see a large, red wine stain on your partner's white clothing?                               |
| 54     | When at a reception, how difficult is it to see a guest wearing dark clothing standing against a dark wall?                             | CO            | IG                | Minor Revision  | CO            | IG                | When at a reception, how difficult is it to see a guest wearing dark clothing standing against a white wall?                                            |

| Item # | Original Items (Round 1)                                                                                                                     | Visual Aspect | Functional Domain | Revision status | Visual Aspect | Functional Domain | Revised Items (Round 2)                                                                                                              |
|--------|----------------------------------------------------------------------------------------------------------------------------------------------|---------------|-------------------|-----------------|---------------|-------------------|--------------------------------------------------------------------------------------------------------------------------------------|
| 55     | When drawing a silhouette using a graphite pencil, how difficult is it to see the black pencil outline of your drawing?                      | CO            | VM                | No Change       | CO            | VM                | When drawing a silhouette using a graphite pencil, how difficult is it to see the black pencil outline?                              |
| 56     | How difficult is it to read your own handwritten notes?                                                                                      | FM            | RE                | Deleted         |               |                   |                                                                                                                                      |
| 57     | In a public restroom, how difficult is it to see a well-lit sink?                                                                            | CO            | IG                | Minor Revision  | CO            | IG                | In a well-lit public restroom, how difficult is it to see a dark, gray sink on a white wall?                                         |
| 58     | To avoid burning yourself, how difficult is it to see the flame on a gas stove?                                                              | LM            | IG                | Deleted         |               |                   |                                                                                                                                      |
| 59     | How difficult is it to select a clear button for a white shirt from a sewing kit?                                                            | CO            | IG                | Major Revision  | CO            | IG                | How difficult is it to see a large, black button on a white tuxedo shirt?                                                            |
| 60     | When staining or varnishing wood, how difficult is it to see if the coat is evenly distributed?                                              | CO            | IG                | Major Revision  | CO            | IG                | When staining light, pinewood with a dark mahogany varnish, how difficult is it to see if the coat is evenly distributed?            |
| 61     | In a hotel room, how difficult is it for you to find the bathroom in the middle of the night if the bathroom light has been left on?         | LM            | MO                | No Change       | LM            | MO                | In a hotel room, how difficult is it for you to find the bathroom in the middle of the night if the bathroom light has been left on? |
| 62     | When attending a meeting, how difficult is it to see where the projection screen is in a brightly lit room?                                  | CO            | VM                | Minor Revision  | CO            | VM                | When attending a meeting, how difficult is it to locate the illuminated, white projection screen in a dark room?                     |
| 63     | When using a calculator, how difficult is it to see the numbers on the buttons?                                                              | CO            | IG                | Minor Revision  | CO            | IG                | When using your remaining vision, how difficult is it to see the white numbers on the black buttons on a desk calculator?            |
| 64     | When vacuuming, how difficult is it for you to see where a dark carpet meets a dark couch without running the vacuum cleaner into the couch? | CO            | IG                | Deleted         |               |                   |                                                                                                                                      |

| Item # | Original Items (Round 1)                                                                                                      | Visual Aspect | Functional Domain | Revision status | Visual Aspect | Functional Domain | Revised Items (Round 2)                                                                                                                                |
|--------|-------------------------------------------------------------------------------------------------------------------------------|---------------|-------------------|-----------------|---------------|-------------------|--------------------------------------------------------------------------------------------------------------------------------------------------------|
| 65     | At an airport, how difficult is it for you to recognize your dark-colored luggage on baggage carousel?                        | FM            | VM                | Minor Revision  | FM            | VM                | At an airport, how difficult is it for you to recognize your brightly marked luggage on baggage carousel?                                              |
| 66     | How difficult is it for you to locate the scoreboard at a sporting event?                                                     | LM            | VM                | Minor Revision  | LM            | VM                | How difficult is it for you to locate the scoreboard at a sporting event at night?                                                                     |
| 67     | How difficult is it to see if your server is standing at a nearby table so that you can get their attention?                  | DI            | IG                | Minor Revision  | DI            | IG                | How difficult is it to see if a server is standing at a nearby table 3 ft. away so that you can get their attention?                                   |
| 68     | When using a computer, how difficult is it for you to track a large, moving cursor?                                           | MP            | VM                | Minor Revision  | MP            | VM                | When using a computer, how difficult is it for you to track a large, moving white cursor against a dark background?                                    |
| 69     | How difficult is it for you to see bold black marker written on a white calendar?                                             | CO            | IG                | Major Revision  | CO            | IG                | Using your assistive device, how difficult is it for you to see bold black marker written on a white calendar?                                         |
| 70     | How difficult is it for you to see the difference between an orange bottle of laundry detergent and a white bottle of bleach? | CO            | IG                | Minor Revision  | CO            | IG                | How difficult is it for you to see the difference between a similarly sized or shaped orange bottle of laundry detergent and a white bottle of bleach? |
| 71     | In a public restroom, how difficult is it to see a white toilet against a white background?                                   | CO            | VM                | Minor Revision  | CO            | VM                | In a well-lit public restroom, how difficult is it to see a white toilet blending with the white wall?                                                 |
| 72     | When feeding a child, how difficult is it to see their mouth?                                                                 | DI            | VM                | Minor Revision  | DI            | VM                | When feeding a child, how difficult is it to see their open mouth?                                                                                     |
| 73     | When walking or jogging, how difficult is it to see a moving car headed in your direction?                                    | MP            | MO                | Major Revision  | MP            | MO                | When walking or jogging on a cloudy day, how difficult is it to see a black parked car on your side of the street from 10ft. away?                     |
| 74     | How difficult is it for you to use your remaining vision to identify a food item at eye level in the refrigerator?            | CO            | IG                | Minor Revision  | CO            | IG                | How difficult is it for you to use your remaining vision to identify a dark-colored food item at eye level in the refrigerator?                        |



| Item # | Original Items (Round 1)                                                                                                  | Visual Aspect | Functional Domain | Revision status | Visual Aspect | Functional Domain | Revised Items (Round 2)                                                                                                                                   |
|--------|---------------------------------------------------------------------------------------------------------------------------|---------------|-------------------|-----------------|---------------|-------------------|-----------------------------------------------------------------------------------------------------------------------------------------------------------|
| 75     | How difficult is it for you to see the difference between a pair of khakis and a pair of dark denim jeans?                | CO            | IG                | Minor Revision  | CO            | IG                | How difficult is it for you to see the difference between a pair of khakis and a pair of dark denim jeans under fluorescent lighting?                     |
| 76     | How difficult is to see if your cell phone screen is on or off?                                                           | CO            | IG                | Minor Revision  | CO            | IG                | How difficult is to see if your cell phone screen is on in a dark room?                                                                                   |
| 77     | When standing on a dock, how difficult is it for you to see a large cargo or cruise ship sailing into port?               | SZ            | IG                | Minor Revision  | SZ            | IG                | When standing on a dock, how difficult is it for you to see a large, white cruise ship sailing into port?                                                 |
| 78     | When washing a white plate, how difficult is it to see if there's red sauce stuck on it?                                  | CO            | IG                | Minor Revision  | CO            | IG                | When washing a white plate, how difficult is it to see if there's chocolate syrup stuck on it?                                                            |
| 79     | How difficult is it for you to see a red tomato on a green vine?                                                          | CO            | IG                | No Change       | CO            | IG                | How difficult is it for you to see a red tomato on a green vine?                                                                                          |
| 80     | How difficult is it for you to see if the horizontal or vertical blinds are open or closed during the day?                | EL            | IG                | Minor Revision  | EL            | IG                | How difficult is it for you to see if the horizontal or vertical blinds in a dimly lit room are open or closed on a sunny day?                            |
| 81     | When at the dinner table, how difficult is it to see the difference between the clear shakers with salt and black pepper? | CO            | IG                | Minor Revision  | CO            | IG                | When at the dinner table, how difficult is it to see the difference between the clear salt and black pepper shakers if they are right next to your plate? |
| 82     | When being photographed, how difficult is it to see the person holding the camera standing 10 ft. away?                   | DI            | IG                | Minor Revision  | DI            | IG                | When being photographed, how difficult is it to see the person holding the camera standing 5 ft. away?                                                    |
| 83     | In a public restroom, how difficult is it to see the dark paper towel dispenser or hand dryer on a white wall?            | CO            | VM                | Minor Revision  | CO            | VM                | In a well-lit public restroom, how difficult is it to see the dark paper towel dispenser or hand dryer on a white wall?                                   |
| 84     | When shopping in the supermarket, how difficult is it to see the difference between chicken breast and a cut of steak?    | CO            | IG                | Major Revision  | CO            | IG                | When shopping in the supermarket, how difficult is it to see the difference between a white bagel and pumpernickel bagel?                                 |

| Item # | Original Items (Round 1)                                                                                                                     | Visual Aspect | Functional Domain | Revision status | Visual Aspect | Functional Domain | Revised Items (Round 2)                                                                                                              |
|--------|----------------------------------------------------------------------------------------------------------------------------------------------|---------------|-------------------|-----------------|---------------|-------------------|--------------------------------------------------------------------------------------------------------------------------------------|
| 85     | When cleaning up after your pet, how difficult is it for you to see pet droppings on the sidewalk?                                           | CO            | VM                | Minor Revision  | CO            | VM                | When cleaning up after your pet, how difficult is it for you to see pet droppings on the light-colored sidewalk?                     |
| 86     | When boating, how difficult is it for you to see the shoreline?                                                                              | DI            | IG                | Minor Revision  | DI            | IG                | When boating on a river 100 ft wide, how difficult is it for you to see the shoreline?                                               |
| 87     | When attending a social function, how difficult is it to recognize hand gestures when speaking to a fellow attendee?                         | MP            | VM                | Minor Revision  | MP            | VM                | When attending a social function, how difficult is it to notice hand gestures when speaking to a fellow attendee standing 2ft. away? |
| 88     | When attending a social function, how difficult is it to see if there is water in a clear glass?                                             | CO            | IG                | Minor Revision  | CO            | IG                | When attending a social function, how difficult is it to see if there is red wine in a clear glass standing right in front of you?   |
| 89     | How difficult is it for you to see the difference between brown socks and black socks?                                                       | CO            | IG                | Minor Revision  | CO            | IG                | How difficult is it for you to see the difference between white socks and black socks?                                               |
| 90     | When taking a picture, how difficult is to center the silhouette of a person on the digital display of the camera?                           | CO            | VM                | Minor Revision  | CO            | VM                | When taking a picture, how difficult is to center the high contrast silhouette of a person on the digital display of the camera?     |
| 91     | How difficult is it for you to read the brand name in large print on a box of cereal?                                                        | CO            | VM                | Major Revision  | CO            | VM                | How difficult is it for you to locate the large, black Cheerios brand name on the yellow box?                                        |
| 92     | How difficult is it to navigate a well-lit gym without bumping into people or objects?                                                       | LM            | MO                | Deleted         |               |                   |                                                                                                                                      |
| 93     | If labeled with a thick black pen, how difficult is it to visually identify the correct medication?                                          | CO            | IG                | Deleted         |               |                   |                                                                                                                                      |
| 94     | How difficult is it for you to navigate a brightly lit restaurant with white tablecloths and dark carpeting without bumping into any tables? | CO            | IG                | Minor Revision  | CO            | IG                | How difficult is it for you to see tables with white tablecloths against dark carpeting in a brightly lit restaurant?                |

| Item # | Original Items (Round 1)                                                                                                      | Visual Aspect | Functional Domain | Revision status       | Visual Aspect | Functional Domain | Revised Items (Round 2)                                                                                                                           |
|--------|-------------------------------------------------------------------------------------------------------------------------------|---------------|-------------------|-----------------------|---------------|-------------------|---------------------------------------------------------------------------------------------------------------------------------------------------|
| 95     | When standing in the kitchen, how difficult is to see a clear empty glass on the counter?                                     | CO            | VM                | <i>No Change</i>      | CO            | VM                | When standing in the kitchen, how difficult is to see a clear empty glass on the counter?                                                         |
| 96     | When walking down the hallway looking for a meeting room, how difficult is it to see if the lights are on in the room?        | LM            | MO                | <i>Minor Revision</i> | LM            | MO                | When walking down a dimly lit hallway looking for a meeting room, how difficult is it to see if the lights are on in the room?                    |
| 97     | How difficult is it to see a fast-moving basketball coming towards you?                                                       | MP            | VM                | <i>Major Revision</i> | MP            | VM                | How difficult is it to see a white soccer ball rolling slowly down a black asphalt driveway?                                                      |
| 98     | In a familiar social setting, how difficult is it for you to navigate around the furniture to find an open seat at the table? | FM            | MO                | <i>Deleted</i>        |               |                   |                                                                                                                                                   |
| 99     | When walking on a track, how difficult is it to stay in your lane by following the white lines?                               | CO            | MO                | <i>Minor Revision</i> | CO            | MO                | When walking on a dark-colored track, how difficult is it to stay in your lane by following the freshly-painted white lines?                      |
| 100    | When walking around an indoor shopping mall, how difficult is it to see an escalator against a light background?              | CO            | MO                | <i>Minor Revision</i> | CO            | MO                | When walking around an indoor shopping mall, how difficult is it to see the entrance to an escalator from 5ft. away?                              |
| 101    | When looking for a meeting room, how difficult is it for you to see a 3 inch-sized room number when standing 2 feet away?     | SZ            | IG                | <i>Minor Revision</i> | SZ            | IG                | When standing at an office door, how difficult is it for you to see a 3 inch-sized room number when standing 2 feet away?                         |
| 102    | How difficult is it for you to see white rice on a white plate?                                                               | CO            | IG                | <i>No Change</i>      | CO            | IG                | How difficult is it for you to see white rice on a white plate?                                                                                   |
| 103    | How difficult is it to see a team's white uniform against a dark green playing field?                                         | CO            | IG                | <i>Major Revision</i> | CO            | IG                | When watching a baseball pitcher wind up on a large screen TV, how difficult is it to see his white uniform against the dark green playing field? |
| 104    | How difficult is it for you to see if your computer monitor is on in a dark room?                                             | LM            | IG                | <i>No Change</i>      | LM            | IG                | How difficult is it for you to see if your computer monitor is on in a dark room?                                                                 |

| <b>Item #</b> | <b>Original Items (Round 1)</b>                                                                                                | <b>Visual Aspect</b> | <b>Functional Domain</b> | <b>Revision status</b> | <b>Visual Aspect</b> | <b>Functional Domain</b> | <b>Revised Items (Round 2)</b>                                                                                                                            |
|---------------|--------------------------------------------------------------------------------------------------------------------------------|----------------------|--------------------------|------------------------|----------------------|--------------------------|-----------------------------------------------------------------------------------------------------------------------------------------------------------|
| 105           | In a public restroom, how difficult is it to see where the exit is?                                                            | LM                   | VM                       | <i>Minor Revision</i>  | LM                   | VM                       | In a well-lit public restroom, how difficult is it to see where the exit is?                                                                              |
| 106           | When attending your place of worship, how difficult is it to see a well-lit podium?                                            | DI                   | IG                       | <i>Minor Revision</i>  | DI                   | IG                       | When attending a place of worship, how difficult is it to see a well-lit podium from the front row?                                                       |
| 107           | How difficult is it to read a handwritten note in large print with a thick black pen?                                          | CO                   | IG                       | <i>Major Revision</i>  | CO                   | IG                       | How difficult is it to see if the thick marker you just used to write a note in large print is running out of ink?                                        |
| 108           | When navigating an office building, how difficult is it to see if a glass door is open or closed?                              | CO                   | IG                       | <i>No Change</i>       | CO                   | IG                       | When navigating an office building, how difficult is it to see if a glass door is open or closed?                                                         |
| 109           | When sitting close to the TV, how difficult is it to identify the location of the host or announcer of a game or variety show? | CO                   | IG                       | <i>Minor Revision</i>  | CO                   | IG                       | When sitting close to the TV, how difficult is it to locate the host or announcer of a game or variety show if they are standing in the middle of screen? |
| 110           | When checking wounds, how difficult is it to see blood on a white paper towel or gauze?                                        | CO                   | IG                       | <i>Minor Revision</i>  | CO                   | IG                       | When dressing a wound, how difficult is it to see a large blood stain on a white paper towel or gauze?                                                    |
| 111           | During the Holidays, how difficult is it for you to see if a house has been decorated with lights at night?                    | CO                   | IG                       | <i>Minor Revision</i>  | CO                   | IG                       | During the Holidays, how difficult is it for you to see if a house has been decorated with bright, white lights at night?                                 |
| 112           | When painting or drawing, how difficult is it to select the appropriate shade of yellow from the color palette                 | MI                   | IG                       | <i>No Change</i>       | MI                   | IG                       | When painting or drawing, how difficult is it to select the appropriate shade of yellow from the color palette?                                           |
| 113           | When walking into a casino, how difficult is it to identify the slot machines by their flashing lights?                        | LM                   | IG                       | <i>No Change</i>       | LM                   | IG                       | When walking into a casino, how difficult is it to identify the slot machines by their flashing lights?                                                   |
| 114           | When setting white plates on a white tablecloth, how difficult is it to see whether the place settings are centered?           | CO                   | IG                       | <i>Minor Revision</i>  | CO                   | IG                       | When setting a long table with white plates on a black tablecloth, how difficult is it to see whether the place settings are evenly spaced?               |

| Item # | Original Items (Round 1)                                                                             | Visual Aspect | Functional Domain | Revision status | Visual Aspect | Functional Domain | Revised Items (Round 2)                                                                                                     |
|--------|------------------------------------------------------------------------------------------------------|---------------|-------------------|-----------------|---------------|-------------------|-----------------------------------------------------------------------------------------------------------------------------|
| 115    | How difficult is to see the white numbers on a gray telephone button?                                | CO            | VM                | Minor Revision  | CO            | VM                | How difficult is to locate the large, white numbers on a black telephone?                                                   |
| 116    | How difficult is it for you to select matching clothing in a department store?                       | CO            | IG                | Minor Revision  | CO            | IG                | How difficult is it for you to select a white shirt from a black shirt on a clearance rack in a department store?           |
| 117    | When snow skiing on a clear day, how difficult is it to see how steep an upcoming slope is?          | CO            | MO                | Major Revision  | CO            | MO                | When cross country skiing on a cloudy day, how difficult is it to see an upcoming tree before you or your skis touch it?    |
| 118    | When selecting a spool of thread or yarn, how difficult is it to distinguish light from dark colors? | CO            | IG                | No Change       | CO            | IG                | When selecting a spool of thread or yarn, how difficult is it to distinguish light from dark colors?                        |
| 119    | How difficult is it for you to see to style your hair in a well-lit bathroom?                        | LM            | IG                | Minor Revision  | LM            | IG                | How difficult is it for you to see if your hair is well styled, in a well-lit bathroom?                                     |
| 120    | How difficult is it for you to see large numbers on a digital alarm clock?                           | SZ            | IG                | Minor Revision  | SZ            | IG                | How difficult is it for you to see large numbers on a digital alarm clock in a dark room?                                   |
| 121    | When hunting, how difficult is it for you to see a deer from 30 yards away?                          | DI            | IG                | Major Revision  | DI            | IG                | When walking through the woods on a sunny day, how difficult is it for you to see a deer from 30 yards away?                |
| 122    | When bowling, how difficult is to aim the ball using the dark gutters as guidelines?                 | CO            | VM                | Minor Revision  | CO            | VM                | When bowling, how difficult is it to aim the ball down the light-colored bowling lane using the dark gutters as guidelines? |
| 123    | When standing at a newsstand, how difficult is it to read the headline of a newspaper?               | MI            | IG                | Major Revision  | MI            | IG                | How difficult is it to tell the difference between the New York Times and USA Today?                                        |
| 124    | How difficult is to look up a written phone number in your address book?                             | CO            | RE                | Minor Revision  | CO            | RE                | How difficult is to look up a written phone number in your address book using magnification?                                |

| Item # | Original Items (Round 1)                                                                                       | Visual Aspect | Functional Domain | Revision status | Visual Aspect | Functional Domain | Revised Items (Round 2)                                                                                                                                                   |
|--------|----------------------------------------------------------------------------------------------------------------|---------------|-------------------|-----------------|---------------|-------------------|---------------------------------------------------------------------------------------------------------------------------------------------------------------------------|
| 125    | When performing, how difficult is it for you to see the edge of a brightly lit set or stage?                   | CO            | IG                | No Change       | CO            | IG                | When performing, how difficult is it for you to see the edge of a brightly lit set or stage?                                                                              |
| 126    | How difficult is it for you to see your cat's hairball on the dark floor?                                      | CO            | IG                | Minor Revision  | CO            | IG                | How difficult is it for you to see your cat's dark hairball on a white carpet?                                                                                            |
| 127    | When attending your place of worship, how difficult is it to see if your regular seat is empty?                | FM            | IG                | Minor Revision  | FM            | IG                | When attending a meeting or class, how difficult is it to see if your regular seat is empty?                                                                              |
| 128    | In an exercise class, how difficult is it for you to see the instructor in dim lighting conditions?            | EL            | IG                | Major Revision  | CO            | IG                | In an exercise class, how difficult is it for you to see the instructor in a dark training suit against a light background in bright lighting conditions from 5 ft. away? |
| 129    | How difficult is it to identify large print playing cards in your hand?                                        | MI            | IG                | Minor Revision  | MI            | IG                | When holding large, print playing cards, how difficult is it to tell if you're holding a face card?                                                                       |
| 130    | How difficult is it to see chocolate chips in a chocolate chip cookie?                                         | CO            | IG                | No Change       | CO            | IG                | How difficult is it to see chocolate chips in a chocolate chip cookie?                                                                                                    |
| 131    | How difficult is it to visually check for doneness or browning when cooking a steak?                           | CO            | IG                | No Change       | CO            | IG                | How difficult is it to visually check for doneness or browning when cooking a steak?                                                                                      |
| 132    | How difficult is it for you to find your gate on your own in a bright airport?                                 | DI            | RE                | Major Revision  | DI            | RE                | When standing at the gate in a bright airport, how difficult is it for you to see your gate number?                                                                       |
| 133    | How difficult is it to navigate the freshly plowed or shoveled sidewalk with sunlight reflecting off the snow? | CO            | IG                | Major Revision  | CO            | IG                | On a cloudy day, how difficult is it to see where the black pavement meets the snow bank?                                                                                 |
| 134    | How difficult is it to see the product brand on packaging if you hold it up close to your face?                | SZ            | IG                | Deleted         |               |                   |                                                                                                                                                                           |

| Item # | Original Items (Round 1)                                                                                                                      | Visual Aspect | Functional Domain | Revision status | Visual Aspect | Functional Domain | Revised Items (Round 2)                                                                                                                                                         |
|--------|-----------------------------------------------------------------------------------------------------------------------------------------------|---------------|-------------------|-----------------|---------------|-------------------|---------------------------------------------------------------------------------------------------------------------------------------------------------------------------------|
| 135    | In a social setting, how difficult is it for you to distinguish people with white or blond hair from people with dark hair?                   | CO            | IG                | Major Revision  | CO            | IG                | In a well-lit social setting, how difficult is it for you to distinguish people with white or blond hair from people with dark hair when they are standing against a dark wall? |
| 136    | When visiting someone in a hospital, how difficult is it to see a pale-skinned, elderly person in a light-colored hospital gown lying in bed? | CO            | IG                | No Change       | CO            | IG                | When visiting someone in a hospital, how difficult is it to see a pale-skinned, elderly person in a light-colored hospital gown lying in bed?                                   |
| 137    | How difficult is to see the dark clouds of an approaching storm?                                                                              | CO            | IG                | Minor Revision  | CO            | IG                | How difficult is to see the dark clouds of an approaching storm during the day?                                                                                                 |
| 138    | When attending a social function, how difficult is it to identify an open seat in dim lighting conditions?                                    | MI            | VM                | Major Revision  | MI            | VM                | At the doctor's office, how difficult is it to see an open seat in a well-lit waiting room?                                                                                     |
| 139    | How difficult is it for you to see a dark pill on a light countertop?                                                                         | CO            | IG                | Minor Revision  | CO            | IG                | When standing at a white countertop, how difficult is it for you to notice a dark pill lying right in front of you?                                                             |
| 140    | How difficult is it to navigate in a dimly lit garage without bumping into obstacles?                                                         | LM            | MO                | Minor Revision  | LM            | MO                | How difficult is it to navigate in a brightly lit garage without bumping into obstacles?                                                                                        |
| 141    | How difficult is it for you to identify a landmark, such as light colored rocks, in a wooded area?                                            | CO            | IG                | Major Revision  | CO            | IG                | When coming to a clearing in a pine forest, how difficult is it for you to see a landmark 5 ft. away, such as large, light-colored rocks against dark trees?                    |
| 142    | When dancing with a partner 2 feet away, how difficult is it for you to see them on the brightly lit dance floor?                             | DI            | VM                | No Change       | DI            | VM                | When dancing with a partner 2 feet away, how difficult is it for you to see them on the brightly lit dance floor?                                                               |
| 143    | How difficult is it to see spaghetti sauce stains on someone else's white shirt?                                                              | CO            | IG                | Minor Revision  | CO            | IG                | How difficult is it to see a large, spaghetti sauce stains on your white shirtsleeve?                                                                                           |
| 144    | How difficult is it for you to see a large fireworks display against the night sky?                                                           | LM            | IG                | Minor Revision  | LM            | IG                | How difficult is it for you to see a large, white fireworks display against the night sky?                                                                                      |

| Item #                                       | Original Items (Round 1)                                                                                                                   | Visual Aspect | Functional Domain | Revision status       | Visual Aspect | Functional Domain | Revised Items (Round 2)                                                                                                                               |
|----------------------------------------------|--------------------------------------------------------------------------------------------------------------------------------------------|---------------|-------------------|-----------------------|---------------|-------------------|-------------------------------------------------------------------------------------------------------------------------------------------------------|
| 145                                          | When fishing, how difficult is it for you to see the bobber in the water if there is glare from the sun?                                   | EL            | IG                | <i>Deleted</i>        |               |                   |                                                                                                                                                       |
| 146                                          | When riding in a car at night, how difficult is it to see oncoming headlights?                                                             | LM            | IG                | <i>No Change</i>      | LM            | IG                | When riding in a car at night, how difficult is it to see oncoming headlights?                                                                        |
| 147                                          | How difficult is it for you to use your remaining vision to identify your drink preference from a soda fountain at a fast food restaurant? | MI            | IG                | <i>No Change</i>      | MI            | IG                | How difficult is it for you to use your vision to identify your drink preference from a soda fountain at a fast food restaurant?                      |
| 148                                          | When walking under a clear night sky in a rural or suburban setting, how difficult is it to see the full moon?                             | LM            | VM                | <i>No Change</i>      | LM            | VM                | When walking under a clear night sky in a rural or suburban setting, how difficult is it to see the full moon?                                        |
| 149                                          | When looking for a restroom in a public place, how difficult is it to distinguish the outline of the men's and women's signs?              | MI            | IG                | <i>Minor Revision</i> | MI            | IG                | When looking for a restroom in a public place, how difficult is it to distinguish the outline of the men's and women's signs when standing 2ft. away? |
| <b><i>New Generated Items in Round 2</i></b> |                                                                                                                                            |               |                   |                       |               |                   |                                                                                                                                                       |
|                                              |                                                                                                                                            |               |                   | <i>New</i>            | LM            | IG                | How difficult to see if a candle is lit in a dark room?                                                                                               |
|                                              |                                                                                                                                            |               |                   | <i>New</i>            | CO            | IG                | When standing at a black countertop, how difficult is it for you to notice a white pill lying right in front of you?                                  |
|                                              |                                                                                                                                            |               |                   | <i>New</i>            | MI            | IG                | When picking up a prawn from your white plate, how difficult is it to see where its tail is?                                                          |
|                                              |                                                                                                                                            |               |                   | <i>New</i>            | CO            | VM                | How difficult is it to see the stainless steel water fountain against the white wall in a well-lit gym?                                               |



| Item # | Original Items (Round 1) | Visual Aspect | Functional Domain | Revision status | Visual Aspect | Functional Domain | Revised Items (Round 2)                                                                                        |
|--------|--------------------------|---------------|-------------------|-----------------|---------------|-------------------|----------------------------------------------------------------------------------------------------------------|
|        |                          |               |                   | <i>New</i>      | <b>MP</b>     | <b>IG</b>         | How difficult is it to see a person wearing a black winter coat walking in the snow?                           |
|        |                          |               |                   | <i>New</i>      | <b>CO</b>     | <b>IG</b>         | How difficult is it to identify the border of a dark, rug on a light, hardwood floor?                          |
|        |                          |               |                   | <i>New</i>      | <b>LM</b>     | <b>IG</b>         | How difficult is it for you to identify if the lights are on in the room?                                      |
|        |                          |               |                   | <i>New</i>      | <b>LM</b>     | <b>VM</b>         | How difficult is it for you to locate a window in a dark room on a sunny day?                                  |
|        |                          |               |                   | <i>New</i>      | <b>EL</b>     | <b>IG</b>         | When standing outside at high noon, how difficult is it for you to tell whether it is sunny outside?           |
|        |                          |               |                   | <i>New</i>      | <b>CO</b>     | <b>IG</b>         | When camping on a moonless, cloudy night, how difficult is it to see if the flashlight you are holding is on?  |
|        |                          |               |                   | <i>New</i>      | <b>LM</b>     | <b>IG</b>         | When camping on a moonless, cloudy night, how difficult is it to see the large burning campfire from 5ft away? |
|        |                          |               |                   | <i>New</i>      | <b>CO</b>     | <b>IG</b>         | How difficult is it to see a person's black tie against their white shirt from 2 ft away?                      |
